# Supplementary material for: Cooperation between oncogenic Ras and wild-type p53 stimulates STAT non-cell autonomously to promote tumor radioresistance
Source: PubMed Central journal article supplement (PMC7979758; doi:10.1038/s42003-021-01898-5), 2021-03-19
Supplement: 42003_2021_1898_MOESM3_ESM.pdf [file 42003_2021_1898_MOESM3_ESM.pdf]

## Description of Additional Supplementary Files

**File name:** Supplementary Data 1

**Description:** Source data file for all graphs presented in the paper.
